# Supplementary material for: Mental Health Impacts of Tornadoes: A Systematic Review
Source: MDPI journal article supplement (doi:10.3390/ijerph192113747), 2022-10-22
Supplement: s1 [file s1]

**Table S1.** Assessment of risk of bias.

| No. in Reference | Authors & Year                                   | 1 | 2 | 3 | 4 | 5 | 6 | 7 | 8 | 9   | 10 | Over all bias  |
|------------------|--------------------------------------------------|---|---|---|---|---|---|---|---|-----|----|----------------|
| 4                | First, Jennifer M et al., 2021                   | Y | Y | Y | N | Y | Y | Y | Y | N/A |    | 7/8 (Low)      |
| 15               | Abel, Madelaine R et al., 2021                   | Y | Y | Y | N | Y | Y | Y | Y |     |    | 7/8 (Low)      |
| 16               | Adams, Zachary W et al., 2015                    | Y | Y | Y | N | Y | Y | Y | Y |     |    | 7/8 (Low)      |
| 17               | Bountress, Kaitlin E et al., 2017                | Y | Y | Y | N | Y | Y | Y | Y |     |    | 7/8 (Low)      |
| 18               | Bountress, Kaitlin E et al., 2020                | Y | Y | Y | Y | Y | Y | Y | Y |     |    | 7/8 (Low)      |
| 19               | Carbone, Eric G et al., 2017                     | Y | Y | Y | N | Y | Y | Y | Y |     |    | 7/8 (Low)      |
| 20               | Clay, Lauren A & Greer, Alex 2019                | N | Y | Y | N | Y | Y | Y | Y |     |    | 7/8 (Low)      |
| 21               | Cohen, Joseph R et al., 2016                     | Y | Y | Y | N | Y | Y | Y | Y |     |    | 7/8 (Low)      |
| 22               | Danielson, Carla K et al., 2017                  | Y | Y | Y | N | Y | Y | Y | Y |     |    | 7/8 (Low)      |
| 23               | Evans, L. G & Oehler-Stinnett, J, 2006           | N | N | Y | N | Y | N | Y | Y |     |    | 4/8 (Moderate) |
| 24               | Gilmore, Amanda et al., 2018                     | Y | Y | Y | N | Y | N | N | Y |     |    | 5/8 (Moderate) |
| 25               | Hambrick, Erin P et al., 2016                    | Y | N | Y | N | Y | Y | Y | Y |     |    | 6/8 (Moderate) |
| 26               | Hambrick, Erin P et al., 2017                    | Y | N | Y | N | Y | Y | N | Y |     |    | 5/8 (Moderate) |
| 27               | Hendrickson, Michelle L et al., 2018             | Y | Y | Y | N | Y | Y | Y | Y |     |    | 7/8 (Low)      |
| 28               | Houston, J. Brian & Franken, Noah J, 2015        | Y | Y | Y | N | Y | N | N | Y |     |    | 5/8 (Moderate) |
| 29               | Houston, J. Brian et al., 2015                   | Y | Y | Y | N | Y | Y | Y | Y |     |    | 7/8 (Low)      |
| 30               | Knight, Laura A & Sullivan, Maureen A, 2006      | N | N | N | N | Y | N | N | Y |     |    | 2/8 (High)     |
| 31               | Lack, Caleb W & Sullivan, Maureen A, 2008        | Y | N | N | N | Y | Y | Y | Y |     |    | 5/8 (Moderate) |
| 32               | Lim, Jungkyu et al., 2019                        | Y | N | N | N | Y | N | N | Y |     |    | 3/8 (Moderate) |
| 33               | Lochman, John E et al., 2017                     | Y | Y | Y | N | Y | Y | Y | Y |     |    | 7/8 (Low)      |
| 34               | McKinzie, Ashleigh E, 2018                       | Y | Y | N | N | Y | N | N | N |     |    | 3/8 (Moderate) |
| 35               | Paul, Lisa A et al., 2015                        | Y | Y | Y | N | Y | N | N | Y |     |    | 5/8 (Moderate) |
| 36               | Powell, Tara M. & Bui, Tuyen, 2016               | Y | Y | Y | N | Y | Y | Y | Y |     |    | 7/8 (Low)      |
| 37               | Prohaska, Ariane, 2020                           | Y | Y | Y | N | Y | Y | Y | Y |     |    | 7/8 (Low)      |
| 38               | Resnick, Heidi et al., 2020                      | Y | Y | Y | N | Y | N | N | Y |     |    | 5/8 (Moderate) |
| 39               | Schroeder, Janine M and Polusny, Melissa A, 2004 | N | N | N | N | Y | Y | Y | Y |     |    | 4/8 (Moderate) |
| 40               | Yuan, Guangzhe et al., 2018                      | Y | Y | Y | N | Y | Y | Y | Y |     |    | 7/8 (Low)      |
| 41               | Zuromski, Kelly L et al., 2019                   | Y | Y | Y | N | Y | N | Y | Y |     |    | 6/8 (Low)      |
| 42               | Ruggiero, Kenneth J et al., 2015                 | Y | Y | Y | N | Y | Y | Y | Y |     |    | 7/8 (Low)      |

**Applicable**

1. Was the study's target population a close representation of the national population in relation to relevant variables, e.g., age, sex, occupation? (yes = low risk, no = high risk)
2. Was the sampling frame a true or close representation of the target population? (yes = low risk, no = high risk)
3. Was some form of random selection used to select the sample, or, was a census undertaken? (yes = low risk, no = high risk)
4. Was the likelihood of non-response bias minimal? (yes = low risk, no = high risk)
5. Were data collected directly from the subjects (as opposed to a proxy)? (yes = low risk, no = high risk)
6. Was an acceptable case definition used in the study? (yes = low risk, no = high risk)
7. Was the study instrument that measured the parameter of interest (e.g., prevalence of low back pain) shown to have reliability and validity (if necessary)? (yes = low risk, no = high risk)
8. Was the same mode of data collection used for all subjects? (yes = low risk, no = high risk)

**Not applicable**

9. Was the length of the shortest prevalence period for the parameter of interest appropriate? (yes = low risk, no = high risk)
10. Were the numerator(s) and denominator(s) for the parameter of interest appropriate? (yes = low risk, no = high risk)

**Table S2.** Supporting Information: Study characteristics and overview.

| No. in Ref. | Year | Title                                                                                                                                             | Author(s)                | Method(s)                                     | EF scale | Tornado                                                       | Areas                                                                               | Participants                                          | Aim(s)                                                                                                                                                                                                                                                       | Result(s)                                                                                                                                                                                                                                                                                                                                                                                                                                        |
|-------------|------|---------------------------------------------------------------------------------------------------------------------------------------------------|--------------------------|-----------------------------------------------|----------|---------------------------------------------------------------|-------------------------------------------------------------------------------------|-------------------------------------------------------|--------------------------------------------------------------------------------------------------------------------------------------------------------------------------------------------------------------------------------------------------------------|--------------------------------------------------------------------------------------------------------------------------------------------------------------------------------------------------------------------------------------------------------------------------------------------------------------------------------------------------------------------------------------------------------------------------------------------------|
| 4           | 2021 | Identifying Risk and Resilience Factors Impacting Mental Health among Black and Latinx Adults following Nocturnal Tornadoes in the U.S. Southeast | First, Jennifer M et al. | Survey                                        | EF4      | 2–3 March 2020 nocturnal tornado outbreak in Middle Tennessee | i) Mental health impacts of tornadoes, ii) Risk factors and iii) Protective factors | 221 Black and Latinx adult (18 years or older)        | 1. To Identify barriers to receiving tornado warning alerts<br>2. To Identify a relationship between the barriers, tornado exposure, and adverse mental health outcomes<br>3. To examine if resilience factors contributed to adverse mental health outcomes | 1. Barriers to warning alerts had a significant and positive relationship with more tornado exposure ( $\beta = 0.196$ , $p < 0.05$ ).<br>2. Barriers to warning alerts was related to PTS ( $\beta = 0.200$ , $p < 0.01$ ) and depression symptoms ( $\beta = 0.268$ , $p < 0.001$ ).<br>3. Resilience had a significant and inverse relationship with PTS ( $\beta = -0.149$ , $p < 0.01$ ) and depression ( $\beta = -0.229$ , $p < 0.001$ ). |
| 15          | 2021 | Talking with children about natural disasters: Maternal acknowledgment, child emotion talk, and child posttraumatic stress symptoms.              | Abel, Madelaine R et al. | Quantitative (Data analytic after Interviews) | EF5      | 2011 Tornado outbreak in Alabama and Joplin                   | i) Mental health impacts of tornadoes                                               | Forty-nine children ages 8–12 years and their mothers | To examine the association between qualities of parent-child co-reminiscing and children's posttraumatic stress symptoms after a tornado                                                                                                                     | 1. Child negative emotion words were positively associated with PTSS at lower levels of maternal support ( $B=3.04$ , $SE=1.07$ , $p=0.007$ , 95% CI [0.88, 5.20]).<br>2. Child positive emotion words was positively associated with PTSS at lower levels of maternal support ( $B=2.14$ , $SE=0.87$ , $p=0.02$ , 95% CI [0.38, 3.90]).                                                                                                         |
| 16          | 2015 | Comorbidity of PTSD, Major Depression, and Substance Use Disorder Among Adolescent Victims of the Spring 2011                                     | Adams, Zachary W et al.  | Survey                                        | EF5      | 2011 Tornado outbreak in Alabama and Joplin                   | i) Mental health impacts of tornadoes                                               | 2,000 adolescents aged 12 to 17 years                 | 1. To estimate the prevalence of comorbid posttraumatic stress disorder, major depressive episode, and                                                                                                                                                       | 1. The most common pattern of comorbidity was PTSD + MDE.<br>2. Approximately one-quarter of adolescents who met criteria for PTSD (26.9%) or MDE (22.7%) also met the threshold for probable SUD.<br>3. The most consistent predictor of each post-disaster comorbidity profile was prior exposure to traumatic events.                                                                                                                         |

|    |      |                                                                                                                |                             |        |     |                                             |                                                               |                                                            |                                                                                                                               |                                                                                                                                                                                                                                                                                                                                                                                                                                                                                                                                                                                                                                                                                                                                                                                                                                              |
|----|------|----------------------------------------------------------------------------------------------------------------|-----------------------------|--------|-----|---------------------------------------------|---------------------------------------------------------------|------------------------------------------------------------|-------------------------------------------------------------------------------------------------------------------------------|----------------------------------------------------------------------------------------------------------------------------------------------------------------------------------------------------------------------------------------------------------------------------------------------------------------------------------------------------------------------------------------------------------------------------------------------------------------------------------------------------------------------------------------------------------------------------------------------------------------------------------------------------------------------------------------------------------------------------------------------------------------------------------------------------------------------------------------------|
|    |      | Tornadoes in Alabama and Joplin, Missouri                                                                      |                             |        |     |                                             |                                                               |                                                            | substance use disorder<br>2. To identify risk factors for patterns of comorbidity among adolescents                           | 4. Among 12- and 13-year-olds, girls (5.6%) endorsed a significantly higher occurrence of PTSD + MDE than boys (2.4%), $X^2(1, n = 660) = 3.90, p = .048, \phi = .08$ .<br>5. Male gender was associated with lower likelihood of PTSD + MDE ( $OR = 0.47$ ) and MDE + SUD ( $OR = 0.11$ ).<br>6. Exposure to prior traumatic events ( $OR = 3.29$ ) was associated with higher odds of meeting diagnostic criteria for MDE + SUD ( $OR = .15$ ) and extent of service loss ( $OR = 1.95$ ) were also predictive of MDE + SUD comorbidity.                                                                                                                                                                                                                                                                                                   |
| 17 | 2017 | Genetic and psychosocial predictors of alcohol use trajectories among disaster-exposed adolescents             | Bountress, Kaitlin E et al. | Survey | EF5 | 2011 Tornado outbreak in Alabama and Joplin | i) Mental health impacts of tornadoes and<br>ii) Risk factors | 2,000 adolescents aged 12 to 17 years and their caregivers | To examine how severity of disaster exposure, genetic risk, PTSD symptoms, and emotional support predict alcohol use in youth | 1. Older adolescents endorsed drinking .209 more drinks a month than younger adolescents ( $B = .209, p < .001$ ).<br>2. Males reported drinking .050 more drinks a month at the 12-month follow-up than females ( $B = .050, p < .01$ ).<br>3. The interaction between genetic risk and severity of exposure ( $B = .347, p < .01$ ) suggests that for a one unit increase in severity, individuals one standard deviation above the mean on genetic risk increased their drinking by .279 drinks per month ( $B = .279, p < .01$ ).<br>4. The interaction between emotional support and PTSD symptoms ( $B = -.773, p < .001$ ) suggests that for that one standard deviation below the mean on emotional support, a one unit increase in PTSD symptoms was associated with an increase of .557 drinks per month ( $b = .557, p < .001$ ). |
| 18 | 2020 | Impact of disaster exposure severity: Cascading effects across parental distress, adolescent PTSD symptoms, as | Bountress, Kaitlin E et al. | Survey | EF5 | 2011 Tornado outbreak in Alabama and Joplin | i) Mental health impacts of tornadoes and<br>ii) Risk factors | 1,271 adolescents (ages 12-17) and caregivers              | To clarify the prospective associations among such constructs following severe disasters                                      | 1. Greater severity of disaster exposure was associated with increased parental distress and more adolescent PTSD symptoms.<br>2. Higher levels of initial parental distress were associated with more adolescent PTSD symptoms.<br>3. Family income was a significant predictor of parental distress.                                                                                                                                                                                                                                                                                                                                                                                                                                                                                                                                       |

|    |      |                                                                                                                    |                              |        |     |                                                            |                         |                                               |                                                                                                                   |                                                                                                                                                                                                                                                                                                                                                                                                                                                                                                                                                                                                                                                                                                                    |
|----|------|--------------------------------------------------------------------------------------------------------------------|------------------------------|--------|-----|------------------------------------------------------------|-------------------------|-----------------------------------------------|-------------------------------------------------------------------------------------------------------------------|--------------------------------------------------------------------------------------------------------------------------------------------------------------------------------------------------------------------------------------------------------------------------------------------------------------------------------------------------------------------------------------------------------------------------------------------------------------------------------------------------------------------------------------------------------------------------------------------------------------------------------------------------------------------------------------------------------------------|
|    |      | well as parent-child conflict and communication                                                                    |                              |        |     |                                                            |                         |                                               |                                                                                                                   | <p>4. More depressive symptoms were predictive of more parent distress, more adolescent PTSD symptoms, and poorer parent-child conflict communication.</p> <p>5. Adolescent alcohol use was largely not associated with constructs of primary interest at any time point, with the exception of baseline adolescent PTSD symptoms.</p>                                                                                                                                                                                                                                                                                                                                                                             |
| 19 | 2017 | Effects of optimism on recovery and mental health after a tornado outbreak                                         | Carbone, Eric G et al.       | Survey | EF5 | The April 2011 tornado outbreak in Mississippi and Alabama | iii) Protective factors | 3,216 participants who were 18 years or older | To assess the effect of dispositional optimism on post-disaster recovery and mental health                        | <p>1. A significant positive association between optimism and recovery, but optimism was more strongly related to the quality-of-life change for significant levels of home damage (<math>p &lt; .0001</math>, <math>\beta = .40</math>).</p> <p>2. Optimism was negatively associated with the level of symptomatology of depression (<math>p &lt; .0001</math>), anxiety (<math>p &lt; .0001</math>) and PTSD (<math>p &lt; .0001</math>).</p> <p>3. Extent of home damage was positively associated with depressive symptoms (<math>p &lt; .0001</math>), anxiety symptoms (<math>p &lt; .0001</math>) and PTSD symptoms (<math>p &lt; .0001</math>).</p>                                                       |
| 20 | 2019 | Association between long-term stressors and mental health distress following the 2013 Moore tornado: a pilot study | Clay, Lauren A & Greer, Alex | Survey | EF5 | Moore, Oklahoma in 2013                                    | ii) Risk factors        | 71 surveys were returned of 750 households    | To examine the influence of stressors including resource loss and debt on mental health in a sample of households | <p>1. <math>\chi^2</math> and Fisher's exact analysis of disaster exposure measures with the outcome mental health showed that debt (<math>p &lt; 0.01</math>) and resource loss (<math>p &lt; 0.001</math>) were independently associated with mental health.</p> <p>2. In unadjusted logistic regression, high resource loss was a risk factor for poor mental health. For each one unit increase in resource loss summary score, respondents are three percent more likely to report poor mental health (OR 1.03, 95% CI 1.01, 1.06) and respondents that reported taking on debt due to the tornadoes were greater than five times more likely to report poor mental health (OR 5.67, 95% CI 1.60, 20.13).</p> |

|    |      |                                                                                                                                                 |                                  |        |     |                                             |                                                               |                                              |                                                                                                                                                |                                                                                                                                                                                                                                                                                                                                                                                                                                                                                                                                                                                                                                                                                                                                                                                                                                                                                                                                                                                                                                                                                                                                                              |
|----|------|-------------------------------------------------------------------------------------------------------------------------------------------------|----------------------------------|--------|-----|---------------------------------------------|---------------------------------------------------------------|----------------------------------------------|------------------------------------------------------------------------------------------------------------------------------------------------|--------------------------------------------------------------------------------------------------------------------------------------------------------------------------------------------------------------------------------------------------------------------------------------------------------------------------------------------------------------------------------------------------------------------------------------------------------------------------------------------------------------------------------------------------------------------------------------------------------------------------------------------------------------------------------------------------------------------------------------------------------------------------------------------------------------------------------------------------------------------------------------------------------------------------------------------------------------------------------------------------------------------------------------------------------------------------------------------------------------------------------------------------------------|
| 21 | 2016 | Distress Tolerance and Social Support in Adolescence: Predicting Risk for Internalizing and Externalizing Symptoms Following a Natural Disaster | Cohen, Joseph R et al.           | Survey | EF5 | 2011 Tornado outbreak in Alabama and Joplin | i) Mental health impacts of tornadoes                         | 352 adolescents aged 12–17 years             | To examine the interactive relation between behavioral distress tolerance and perceived social support                                         | <p>1. For depression and PTSD, age, sex, race, and completing the intervention did not influence the relation between DT/PSS and symptoms (<math>p &gt; .05</math>).</p> <p>2. As with depression, the interaction between DT and PSS predicted prospective PTSD symptoms was significant (<math>B = -0.0002</math>; <math>SE = 0.0001</math>; <math>t(195) = -2.08</math>, <math>p = .04</math>; <math>r_{\text{effect size}} = 0.15</math>).</p> <p>3. PSS (<math>B = 0.0039</math>; <math>SE = 0.0018</math>; <math>t(139) = -2.20</math>, <math>p = .03</math>; <math>r_{\text{effect size}} = 0.18</math>), but not DT (<math>B = -0.0001</math>; <math>SE = 0.0001</math>; <math>t(130) = -0.79</math>, <math>p = .43</math>; <math>r_{\text{effect size}} = 0.07</math>), predicted substance use, such that lower levels of PSS predicted elevated levels of substance use.</p>                                                                                                                                                                                                                                                                      |
| 22 | 2017 | Clinical Decision-Making Following Disasters: Efficient Identification of PTSD Risk in Adolescents                                              | Danielson, Carla K et al.        | Survey | EF5 | 2011 Tornado outbreak in Alabama and Joplin | i) Mental health impacts of tornadoes and<br>ii) Risk factors | 2,000 adolescent-parent dyads                | To assess individual, interpersonal, and event-related vulnerability factors to determine which indices were most accurate in forecasting PTSD | <p>1. Females and older adolescents were more likely to report a diagnosis of PTSD since the natural disaster (<math>p &lt; .05</math>).</p> <p>2. Distress tolerance and risk-taking propensity did not discriminate PTSD significantly better than chance (<math>p &gt; .05</math>). Furthermore, disaster impact (<math>AUC = .62</math>) and lifetime substance abuse (<math>AUC = .68</math>) were deemed poor predictors (i.e., <math>AUC &lt; .70</math>) of PTSD.</p> <p>3. Lifetime depression predicted PTSD diagnosis significantly better than trauma history (<math>z = 7.07</math>, <math>p &lt; .001</math>), social support (<math>z = 10.00</math>, <math>p &lt; .001</math>), and family conflict (<math>z = 6.04</math>, <math>p &lt; .001</math>).</p> <p>4. Trauma history outperformed social support (<math>z = 2.34</math>, <math>p &lt; .05</math>).</p> <p>5. The interaction between social support and family conflict (<math>B = .03</math>, <math>SE = .02</math>; <math>W = 4.59</math>, <math>p = .03</math>) was the only significant interaction between the indicator variables (all other <math>ps &gt; .10</math>).</p> |
| 23 | 2006 | Structure and prevalence of PTSD symptomology in children who                                                                                   | Evans, L. G & Oehler-Stinnett, J | Survey | EF5 | Tornadoes in Oklahoma                       | i) Mental health impacts of tornadoes and<br>ii) Risk factors | 152 children, Ages ranged from 6 to 12 years | To evaluate the relationship between children's fear during the tornado and                                                                    | <p>1. How scared the child was during the tornado was significantly correlated with Avoidance, Re-experiencing, Interpersonal Alienation, and the total Score.</p>                                                                                                                                                                                                                                                                                                                                                                                                                                                                                                                                                                                                                                                                                                                                                                                                                                                                                                                                                                                           |

|    |      |                                                                                                                                                                                                                                    |                         |                                          |     |                                             |                                                               |                                  |                                                                                                                                                                                 |                                                                                                                                                                                                                                                                                                                                                                                                                                                                                                                                                                                                                                                                                                                                                                                                                                                                                                                                                                  |
|----|------|------------------------------------------------------------------------------------------------------------------------------------------------------------------------------------------------------------------------------------|-------------------------|------------------------------------------|-----|---------------------------------------------|---------------------------------------------------------------|----------------------------------|---------------------------------------------------------------------------------------------------------------------------------------------------------------------------------|------------------------------------------------------------------------------------------------------------------------------------------------------------------------------------------------------------------------------------------------------------------------------------------------------------------------------------------------------------------------------------------------------------------------------------------------------------------------------------------------------------------------------------------------------------------------------------------------------------------------------------------------------------------------------------------------------------------------------------------------------------------------------------------------------------------------------------------------------------------------------------------------------------------------------------------------------------------|
|    |      | have experienced a severe tornado                                                                                                                                                                                                  |                         |                                          |     |                                             |                                                               |                                  | damage to their school and PTSD                                                                                                                                                 | 2. Whether the school was damaged was related to Avoidance, Foreshortened Future, and the total Score.<br>3. Whether the child's home was damaged and how close the child was to the tornado were not significantly related to the OSU PTSD-CF.                                                                                                                                                                                                                                                                                                                                                                                                                                                                                                                                                                                                                                                                                                                  |
| 24 | 2018 | A Longitudinal Examination of Interpersonal Violence Exposure, Concern for Loved Ones During a Disaster, and Web-Based Intervention Effects on Posttraumatic Stress Disorder Among Adolescent Victims of the Spring 2011 Tornadoes | Gilmore, Amanda et al.  | A secondary data analysis                | EF5 | 2011 Tornado outbreak in Alabama and Joplin | ii) Risk factors                                              | 2,000 adolescents                | To examine adolescents' history of IPV and concern for loved ones during the disaster as moderators of treatment outcomes 4- and 12-months after receiving the BBN intervention | 1. The main effects model revealed a significant association between IPV exposure and PTSD symptoms and an association between gender and PTSD at baseline.<br>2. A significant interaction was found between time, treatment condition (BBN vs. control), and concern for loved ones on PTSD symptoms. Probing of this interaction revealed that among those who were not concerned for loved ones during the disaster, there was no main effect of change over time for adolescents in the BBN condition or the control condition, control: $b = -0.03$ , $p = .338$ , odds ratio (OR) = 0.97; BBN: $b = -0.02$ , $p = .120$ , OR = 1.02.<br>3. Among those who were concerned for loved ones, a different pattern of results emerged. Those in the BBN condition experienced a significant decline in PTSD symptoms over time ( $b = -0.02$ , $p = .041$ , OR = 0.98), whereas those in the control condition did not ( $b = 0.02$ , $p = .255$ , OR = 1.02). |
| 25 | 2016 | Interview and recollection-based research with child disaster survivors: Participation-related changes in emotion and perceptions of participation                                                                                 | Hambrick, Erin P et al. | An in-person interview and phone surveys | EF5 | 2011 Tornado outbreak in Alabama and Joplin | i) Mental health impacts of tornadoes and<br>ii) Risk factors | Fifty 8- to 12-year-old children | To evaluate concurrent and persistent risks and benefits associated with preadolescent disaster survivors' participation in recollection-based disaster research                | Posttraumatic stress symptom severity, tornado exposure, and age were largely unrelated to child-reported emotions and perceptions of research. Results indicate that carefully planned and executed disaster-related research that includes children providing recollections can be conducted with preadolescents with little risk and some benefit.                                                                                                                                                                                                                                                                                                                                                                                                                                                                                                                                                                                                            |

|    |      |                                                                                                                                                                  |                                     |                       |     |                                             |                                                               |                                                        |                                                                                                                                                                       |                                                                                                                                                                                                                                                                                                                                                                                                                                                                                                                                                                                                                                                                                                                                                                                                                                                                                                                                                                                                                         |
|----|------|------------------------------------------------------------------------------------------------------------------------------------------------------------------|-------------------------------------|-----------------------|-----|---------------------------------------------|---------------------------------------------------------------|--------------------------------------------------------|-----------------------------------------------------------------------------------------------------------------------------------------------------------------------|-------------------------------------------------------------------------------------------------------------------------------------------------------------------------------------------------------------------------------------------------------------------------------------------------------------------------------------------------------------------------------------------------------------------------------------------------------------------------------------------------------------------------------------------------------------------------------------------------------------------------------------------------------------------------------------------------------------------------------------------------------------------------------------------------------------------------------------------------------------------------------------------------------------------------------------------------------------------------------------------------------------------------|
| 26 | 2017 | Recalling a Devastating Tornado: Qualities of Child Recollections and Associations with Mental Health Symptoms                                                   | Hambrick , Erin P et al.            | survey                | EF5 | 2011 Tornado outbreak in Alabama and Joplin | i) Mental health impacts of tornadoes and<br>ii) Risk factors | Fifty 8- to 12-year-olds and their mothers             | To explore links between indicators of children's cognitive and emotional processing of trauma in recollections about a tornado and concurrent mental health symptoms | <p>1. Correlations between mental health symptoms, tornado exposure, and child processing variables were found, two hierarchical linear regressions were conducted.</p> <p>2. When controlling for age, gender, verbal ability, whether or not the child received tornado-related mental health treatment, frequency of event rehearsal, family income, and tornado exposure, child processing variables were significantly associated with mental health symptoms. Specifically, Coherence (<math>B=0.275</math>, <math>t = 3.607</math>, <math>p = .001</math>), Positive Emotion (<math>B = 12.425</math>, <math>t = -3.137</math>, <math>p = .003</math>), and Resolutions (<math>B = -.598</math>, <math>t=-2.507</math>, <math>p=.017</math>) were associated with mental health symptoms.</p> <p>3. Whether or not a child had received tornado-related mental health treatment was the only other significant variable in the regression (<math>B=-6.94</math>, <math>t=-2.44</math>, <math>p=.019</math>).</p> |
| 27 | 2018 | Caregiver–adolescent co-reminiscing and adolescents' individual recollections of a devastating tornado: Associations with enduring posttraumatic stress symptoms | Hendricks on, Michelle L et al.     | Individual interviews | EF4 | Tuscaloosa, Alabama in 2011                 | ii) Risk factors                                              | 122 female caregiver and adolescent (aged 12~17) dyads | To evaluate the relation among caregiver–adolescent communication patterns and youth PTSS years after a tornado                                                       | <p>1. There was a significant effect of caregiver egocentrism on youth PTSS, <math>t (118) = 2.02</math>, <math>p = .045</math>, a significant effect of caregiver egocentrism on youth coherence, <math>t (118) = 3.26</math>, <math>p = .001</math>, and a significant effect of youth coherence on youth PTSS, <math>t (118) = 2.51</math>, <math>p = .01</math>. Further, the indirect effect of egocentrism on youth PTSS through coherence had a 95% CI that did not contain zero [0.07, 2.18].</p> <p>2. There was a nonsignificant effect of youth negative personal impact on youth PTSS, <math>t (115) = 0.97</math>, <math>p = .33</math>. However, the interaction of negative personal impact and coherence was significant, <math>t (115) = 2.39</math>, <math>p = .018</math>.</p>                                                                                                                                                                                                                       |
| 28 | 2015 | Disaster interpersonal communication and posttraumatic stress following                                                                                          | Houston, J. Brian & Franken, Noah J | Survey                | EF5 | 2011 Tornado outbreak in Alabama and Joplin | ii) Risk factors                                              | 380 Adult residents at least 18 years old              | To understand how sociodemographic s, disaster experience, and disaster reactions                                                                                     | <p>1. Female talked with family and friends (<math>b = .12</math>, <math>p &lt; .019</math>) and neighbors (<math>b = .11</math>, <math>p &lt; .039</math>) about the tornado more frequently than male participants.</p> <p>2. Participants with direct exposure to the tornado talked about the event with neighbors more frequently (<math>b = .15</math>, <math>p = .004</math>) than participants</p>                                                                                                                                                                                                                                                                                                                                                                                                                                                                                                                                                                                                              |



|    |      |                                                                                                                                                                            |                                       |        |     |                                                                              |                                                                                     |                                          |                                                                                                                                                                           |                                                                                                                                                                                                                                                                                                                                                                                                                                                                                                                                                                                                                                  |
|----|------|----------------------------------------------------------------------------------------------------------------------------------------------------------------------------|---------------------------------------|--------|-----|------------------------------------------------------------------------------|-------------------------------------------------------------------------------------|------------------------------------------|---------------------------------------------------------------------------------------------------------------------------------------------------------------------------|----------------------------------------------------------------------------------------------------------------------------------------------------------------------------------------------------------------------------------------------------------------------------------------------------------------------------------------------------------------------------------------------------------------------------------------------------------------------------------------------------------------------------------------------------------------------------------------------------------------------------------|
|    |      | the 2011 Joplin, Missouri, Tornado                                                                                                                                         |                                       |        |     |                                                                              |                                                                                     |                                          | influence the amount of disaster talk among residents after a tornado                                                                                                     | without direct exposure, and participants who knew someone who died in the tornado attended more community meetings about the tornado ( $b = .22, p < .001$ ) than participants who did not know someone who died in the storm.<br>3. Participants with more PTS symptoms discussed the tornado with friends and family ( $b = .11, p = .045$ ) and neighbors ( $b = .12, p = .039$ ) more frequently and attended more community meetings about the tornado ( $b = .18, p = .001$ ) than participants with fewer PTS symptoms.                                                                                                  |
| 29 | 2015 | 2011 Joplin, Missouri Tornado Experience, Mental Health Reactions, and Service Utilization: Cross-Sectional Assessments at Approximately 6 Months and 2.5 Years Post-Event | Houston, J Brian et al.               | Survey | EF5 | 2011 Tornado outbreak in Alabama and Joplin                                  | i) Mental health impacts of tornadoes, ii) Risk factors and iii) Protective factors | 438 Joplin adults                        | To examine an association between residents' post-tornado experiences, PTS, depression, mental health service, sociodemographic and mental health effects after a tornado | 1. Participants experiencing high tornado impact were more likely than participants experiencing low tornado impact to report probable PTSD and more likely to report current depression.<br>2. Participants with high levels of social support were less likely than participants with low levels of social support to report probable PTSD (OR, 0.36; 95% CI, 0.18-0.73) and current depression (OR, 0.35; 95% CI, 0.17-0.75).<br>3. The majority of individuals with probable PTSD reported speaking with a counselor or mental health professional (83.42%) and a religious professional (85.91%) not at all or very little. |
| 30 | 2006 | Preliminary Development of a Measure to Assess Children's Trauma Attributions                                                                                              | Knight, Laura A & Sullivan, Maureen A | Survey | N/A | A series of tornadoes in Oklahoma (authors did not specify the tornado data) | i) Mental health impacts of tornadoes                                               | 52 children in age from 8 to 12 years    | To assess natural disaster-related attributions in children                                                                                                               | 1. Significant gender differences were found on two TAC subscales, with girls scoring higher on the Search for Meaning and Expectations of Recurrence subscales ( $t[49] = -2.561, p = .014$ ; $t[49] = -2.111, p = .040$ , respectively).<br>2. A significant relationship also emerged between total RI score and degree of child-reported tornado exposure as measured by the TEQ, $r(52) = .57, p = .05$ .                                                                                                                                                                                                                   |
| 31 | 2008 | Attributions, coping, and exposure as predictors of                                                                                                                        | Lack, Caleb W & Sullivan,             | Survey | EF3 | Oklahoma, 2001                                                               | i) Mental health impacts of tornadoes and                                           | Children in Grades 3 through 6 and their | To examine the predictive ability of three factors (attributions,                                                                                                         | 1. A series of correlational analyses were conducted to determine the relationship between posttraumatic distress and the level of exposure the child had to the tornado. Statistically significant                                                                                                                                                                                                                                                                                                                                                                                                                              |

|    |      |                                                                                                                         |                        |                                  |     |                                  |                                                                      |                                                                                                               |                                                                                                                                                                       |                                                                                                                                                                                                                                                                                                                                                                                                                                                                                                                                                                                                                                                                   |
|----|------|-------------------------------------------------------------------------------------------------------------------------|------------------------|----------------------------------|-----|----------------------------------|----------------------------------------------------------------------|---------------------------------------------------------------------------------------------------------------|-----------------------------------------------------------------------------------------------------------------------------------------------------------------------|-------------------------------------------------------------------------------------------------------------------------------------------------------------------------------------------------------------------------------------------------------------------------------------------------------------------------------------------------------------------------------------------------------------------------------------------------------------------------------------------------------------------------------------------------------------------------------------------------------------------------------------------------------------------|
|    |      | long-term posttraumatic distress in tornado-exposed children.                                                           | Maureen A              |                                  |     |                                  | ii) Risk factors                                                     | parents, a total of 102 children and 96 parents                                                               | coping strategies, and degree of exposure to the traumatic event) related to posttraumatic distress                                                                   | relationships were found between the total RI score and parent report of both how scared the child was during the tornado and how worried he or she had been since the tornado, $r(98) = .238$ , $p = .018$ , and $r(98) = .240$ , $p = .017$ , respectively. A significant relationship was also found between total RI score and the child's report of how scared he or she was during the tornado, $r(102) = .480$ , $p < .001$ .<br>2. A statistically significant correlation was found between RI severity score and total score on the TAC, $r(102) = .714$ , $p < .001$ .                                                                                 |
| 32 | 2019 | Individuals' religiosity and emotional coping in response to disasters                                                  | Lim, Jungkyu et al.    | Focus group interview and survey | N/A | Non-specific                     | i) Mental health impacts of tornadoes and<br>iii) Protective factors | - Focus group: 77 Residents of the Southeastern United States<br><br>- Survey: 1,484 Southeast U.S. residents | To examine how individuals' religiosity and emotions affect coping in response to disasters                                                                           | 1. Only fear and hope were significant among various emotions tested with religiosity, the researchers reduced the model. Results from the reduced model indicate that fear, $\text{Exp}(B) = 1.393$ , $p < 0.001$ , and hope, $\text{Exp}(B) = 1.307$ , $p < 0.01$ , were significant predicting variables for taking physical action, controlling for demographics.<br>2. Since religiosity was one of few significant variables, the researchers reduced the model. Results from the reduced regression model indicate that religiosity, $\text{Exp}(B) = 1.419$ , $p < 0.001$ , significantly predicted physical action taking, controlling for demographics. |
| 33 | 2017 | Pre-Post Tornado Effects on Aggressive Children's Psychological and Behavioral Adjustment Through One-Year Postdisaster | Lochman, John E et al. | Survey                           | EF4 | Tuscaloosa County, Alabama. 2011 | i) Mental health impacts of tornadoes and<br>ii) Risk factors        | 360 children in Grades 4–6                                                                                    | To examine how levels of exposure to a tornado and children's characteristics influenced the behavioral and psychological adjustment of children 1-year post-disaster | 1. Children's pre-tornado anxiety level was found to moderate their experience of the degree of exposure to the disaster. When children had high baseline anxiety and they had not been afraid of dying during the tornado, they were likely to have greater declines in parent-rated aggressive and internalizing behavior outcomes across.<br>2. The degree of exposure to the tornado that children experience negatively influences at-risk children's emotional adjustment through the 1-year follow-up.                                                                                                                                                     |

|    |      |                                                                                                                                                                        |                          |                                                        |     |                                             |                                       |                                                                              |                                                                                                                                                                                               |                                                                                                                                                                                                                                                                                                                                                                                                                                                                                                                                                                                                                                                                                                                                                                                                                                                                                                                                                                                                                                                                                                                                                                                                                                                                                                                                                                                                                                         |
|----|------|------------------------------------------------------------------------------------------------------------------------------------------------------------------------|--------------------------|--------------------------------------------------------|-----|---------------------------------------------|---------------------------------------|------------------------------------------------------------------------------|-----------------------------------------------------------------------------------------------------------------------------------------------------------------------------------------------|-----------------------------------------------------------------------------------------------------------------------------------------------------------------------------------------------------------------------------------------------------------------------------------------------------------------------------------------------------------------------------------------------------------------------------------------------------------------------------------------------------------------------------------------------------------------------------------------------------------------------------------------------------------------------------------------------------------------------------------------------------------------------------------------------------------------------------------------------------------------------------------------------------------------------------------------------------------------------------------------------------------------------------------------------------------------------------------------------------------------------------------------------------------------------------------------------------------------------------------------------------------------------------------------------------------------------------------------------------------------------------------------------------------------------------------------|
| 34 | 2018 | In their own words: disaster and emotion, suffering, and mental health                                                                                                 | McKinzie, Ashleigh Elain | Participant observation, interviews, and archival work | EF5 | 2011 Tornado outbreak in Alabama and Joplin | i) Mental health impacts of tornadoes | 162 People who were affected by the tornado and local leaders and volunteers | To explore emotions, trauma, and mental health issues residents experienced after tornadoes                                                                                                   | Four common themes:<br>1) Emotions in immediate aftermath<br>2) Relationship strain<br>3) Mental health problems<br>4) Emotions in long-term recovery were found.                                                                                                                                                                                                                                                                                                                                                                                                                                                                                                                                                                                                                                                                                                                                                                                                                                                                                                                                                                                                                                                                                                                                                                                                                                                                       |
| 35 | 2015 | Mental Health Among Adolescents Exposed to a Tornado: The Influence of Social Support and Its Interactions With Sociodemographic Characteristics and Disaster Exposure | Paul, Lisa A et al.      | Survey                                                 | EF5 | 2011 Tornado outbreak in Alabama and Joplin | ii) Risk factors                      | 2,000 adolescents aged 12 to 17 years and their caregivers                   | To assess adolescents' social support from family and peers and its potential interaction with the disaster-related environment and sociodemographic characteristics on post-tornado distress | 1. Youth with low income experienced a greater number of PTSD symptoms, $M = 3.16$ , 95% CI [2.79, 3.54], and depressive symptoms, $M = 1.77$ , 95% CI [1.56, 1.98], than youth in households reporting high income.<br>2. Adolescent girls reported greater experienced tornado severity ( $M = 3.18$ , $SD = 0.10$ ) than boys ( $M = 3.10$ , $SD = 0.10$ ), $t(1966) = 2.59$ , $p = .010$ . and reported experiencing a greater number of PTSD symptoms ( $M = 2.83$ , $SD = 3.62$ ) than boys ( $M = 2.12$ , $SD = 3.05$ ), $t(1997) = 4.69$ , $p < .001$ .<br>3. Adolescent girls also reported a greater number of post tornado depressive symptoms ( $M = 1.56$ , $SD = 2.13$ ) than boys ( $M = 1.13$ , $SD = 1.70$ ), $t(1996) = 4.50$ , $p < .001$ .<br>4. Lower levels of social support ( $\beta = -.57$ , $p < .001$ ), greater experienced tornado severity ( $\beta = .15$ , $p < .001$ ), lower household income ( $\beta = .13$ , $p = .013$ ), female sex ( $\beta = -.67$ , $p < .001$ ), and older age ( $\beta = .13$ , $p = .002$ ) were associated with greater PTSD symptoms.<br>5. less social support ( $\beta = -.35$ , $p < .001$ ), lower household income ( $\beta = -.10$ , $p = .002$ ), greater experienced tornado severity ( $\beta = .07$ , $p < .001$ ), female sex ( $\beta = .38$ , $p < .001$ ), and older age ( $\beta = .10$ , $p < .001$ ) were associated with greater depressive symptoms. |
| 36 | 2016 | Supporting social and emotional skills after a                                                                                                                         | Powell, Tara M &         | Mixed method                                           | EF5 | Moore, Oklahoma                             | iv) Mental health interventions       | 110 students ranged between 11                                               | To explore the impact of a school-based                                                                                                                                                       | 1. The first paired-samples t-test indicated that there was a significant difference in the scores for the Journey of Hope group on communication                                                                                                                                                                                                                                                                                                                                                                                                                                                                                                                                                                                                                                                                                                                                                                                                                                                                                                                                                                                                                                                                                                                                                                                                                                                                                       |

|    |      |                                                                                                                                                                                 |                       |                        |     |                                             |                                                               |                                                            |                                                                                                                                                                                             |                                                                                                                                                                                                                                                                                                                                                                                                                                                                                                                                                                                                                        |
|----|------|---------------------------------------------------------------------------------------------------------------------------------------------------------------------------------|-----------------------|------------------------|-----|---------------------------------------------|---------------------------------------------------------------|------------------------------------------------------------|---------------------------------------------------------------------------------------------------------------------------------------------------------------------------------------------|------------------------------------------------------------------------------------------------------------------------------------------------------------------------------------------------------------------------------------------------------------------------------------------------------------------------------------------------------------------------------------------------------------------------------------------------------------------------------------------------------------------------------------------------------------------------------------------------------------------------|
|    |      | disaster: Findings from a mixed methods study.                                                                                                                                  | Bui, Tuyen            | (survey and interview) |     |                                             |                                                               | and 15 years old.                                          | psychosocial curriculum entitled Journey of Hope                                                                                                                                            | management $t(53) = -1.96, p = .05$ , while there was no significant difference for the control group $t(48) = .89, p = .37$ .<br>2. A paired-samples $t$ test was then run on prosocial behaviors, indicating a significant difference for the JoH group $t(59) = -4.59, p = .000$ , whereas there were no significant differences for the control group $t(48) = .39, p = .69$ .<br>3. Significant differences were not detected on problem-solving $F(1,97) = .42, p = .517; d = .11$ , personal development $F(1,108) = .422, p = .517; d = .04$ , or general self-efficacy $F(1,107) = .174, p = .678; d = .08$ . |
| 37 | 2020 | Still struggling: intersectionality, vulnerability, and long-term recovery after the Tuscaloosa, Alabama USA Tornado                                                            | Prohaska, Ariane      | In-depth interviews    | EF4 | Tuscaloosa, Alabama, 2011                   | i) Mental health impacts of tornadoes and<br>ii) Risk factors | 29 tornado survivors                                       | To understand how pre-tornado vulnerabilities and social locations affected tornado survivors' recovery 4 to 5 years after a tornado                                                        | 1. Latina women experienced very specific stressors related to the intersections of language barriers, citizenship, ethnicity, and social class.<br>2. Being a renter, a person of color, and lacking insurance pre-storm were major barriers to financial recovery in the long term for the participants in this study.<br>3. The pre-storm stressors of poverty, anxiety, and depression, then, exacerbated the emotional distress of the tornado.                                                                                                                                                                   |
| 38 | 2020 | Prior Interpersonal Violence Exposure and Experiences During and After a Disaster as Predictors of Posttraumatic Stress Disorder and Depression Among Adolescent Victims of the | Resnick, Heidi et al. | Survey                 | EF5 | 2011 Tornado outbreak in Alabama and Joplin | ii) Risk factors                                              | 2,000 adolescents aged 12 to 17 years and their caregivers | To examine the relative roles of demographics, disaster exposure, and specific prior classes of traumatic events (disaster, accident, IPV) as predictors of symptoms of PTSD and depression | 1. Gender was negatively associated with both PTSD and MDD, such that males had roughly half the number of PTSD and MDD symptoms than did females. Age also emerged as significantly positively related to MDD symptoms only, though this effect was small (IRR 1.07, 95% confidence interval [CI] = [1.01, 1.12]).<br>2. Individuals who experienced a physical injury during the tornadoes had nearly double the number of PTSD and MDD symptoms endorsed compared with those who did not experience physical injury.                                                                                                |

|    |      |                                                                                                                 |                                           |        |             |                                                                       |                                                                      |                                                 |                                                                                                                              |                                                                                                                                                                                                                                                                                                                                                                                                                                                                                                                                                                                                                                                                                                                                                                                                                                                                                                                                             |
|----|------|-----------------------------------------------------------------------------------------------------------------|-------------------------------------------|--------|-------------|-----------------------------------------------------------------------|----------------------------------------------------------------------|-------------------------------------------------|------------------------------------------------------------------------------------------------------------------------------|---------------------------------------------------------------------------------------------------------------------------------------------------------------------------------------------------------------------------------------------------------------------------------------------------------------------------------------------------------------------------------------------------------------------------------------------------------------------------------------------------------------------------------------------------------------------------------------------------------------------------------------------------------------------------------------------------------------------------------------------------------------------------------------------------------------------------------------------------------------------------------------------------------------------------------------------|
|    |      | Spring 2011 Tornadoes                                                                                           |                                           |        |             |                                                                       |                                                                      |                                                 |                                                                                                                              | <p>3. Concern about others during the tornadoes also emerged as significantly positively related to PTSD symptoms only (IRR = 1.40, 95% CI = [1.14, 1.72]).</p> <p>4. Prevalence of past month PTSD was significantly higher among those reporting history of IPV (5.50% vs. 0.60%), <math>\chi^2</math> (1, N = 1,926) = 47.14, <math>p &lt; .001</math>, as was prevalence of past month depression (6.30% vs. 0.60%), <math>\chi^2</math> (1, N = 1,978) = 56.32, <math>p &lt; .001</math>.</p>                                                                                                                                                                                                                                                                                                                                                                                                                                          |
| 39 | 2004 | Risk Factors for Adolescent Alcohol Use Following a Natural Disaster                                            | Schroeder , Janine M & Polusny, Melissa A | Survey | F-3 and F-4 | On 29 March 1998, tornadoes in four rural southern Minnesota counties | i) Mental health impacts of tornadoes and<br>ii) Risk factors        | 256 adolescents in grades 10-12                 | To identify potential risk factors for alcohol use in an adolescent exposed to a tornado                                     | <p>1. Age, prior alcohol-related negative consequences, and prior trauma history significantly predicted adolescents' peak alcohol use six months following the disaster.</p> <p>2. Only the extent of prior trauma history and total post-traumatic symptomatology in response to the disaster were significant predictors of adolescents' reporting an increase in the amount of alcohol consumed since the disaster. However, odds ratios of 1.26 and 1.03, respectively, shows little change in the likelihood of reporting increased drinking following the disaster on the basis of a one unit change in prior trauma history and PTSD symptomatology.</p> <p>3. Demographic variables, prior alcohol-related negative consequences, and perceived life threat during the disaster were not significantly associated with an increase in the quantity of alcohol consumed following the tornado among this sample of adolescents.</p> |
| 40 | 2018 | Resilience, Posttraumatic Stress Symptoms, and Posttraumatic Growth in Chinese Adolescents After a Tornado: The | Yuan, Guangzhe et al.                     | Survey | EF4         | 2016 Tornado in Yancheng, Jiangsu in                                  | i) Mental health impacts of tornadoes and<br>iii) Protective factors | 247 Chinese adolescents from two middle schools | To investigate a relationship between resilience, PTSD symptoms, and post-traumatic growth in adolescents by considering the | <p>1. Resilience is associated with increased level of perceived social support, decreased avoidance, decreased hyper, and an increased level of PTG.</p> <p>2. Further, as the level of perceived social support increased, the level of PTG also increased, and the level of intrusion decreased. Perceived social support significantly mediated the relationship between resilience and PTSD symptoms (with the indirect effect = -0.061, 95% CI = -0.103 to -0.021).</p>                                                                                                                                                                                                                                                                                                                                                                                                                                                               |

|    |      |                                                                                                          |                            |        |     |                                             |                                       |                   |                                                                                                                                                                    |                                                                                                                                                                                                                                                                                                                                                                                                                                                                                                                                                                                                                                                                                                                                                                                                       |
|----|------|----------------------------------------------------------------------------------------------------------|----------------------------|--------|-----|---------------------------------------------|---------------------------------------|-------------------|--------------------------------------------------------------------------------------------------------------------------------------------------------------------|-------------------------------------------------------------------------------------------------------------------------------------------------------------------------------------------------------------------------------------------------------------------------------------------------------------------------------------------------------------------------------------------------------------------------------------------------------------------------------------------------------------------------------------------------------------------------------------------------------------------------------------------------------------------------------------------------------------------------------------------------------------------------------------------------------|
|    |      | Role of Mediation Through Perceived Social Support                                                       |                            |        |     |                                             |                                       |                   | role of perceived social support after a tornado                                                                                                                   | 3. In addition, perceived social support also significantly mediated the relationship between resilience and PTG (with the indirect effect = 0.094, 95% CI = 0.064–0.140).                                                                                                                                                                                                                                                                                                                                                                                                                                                                                                                                                                                                                            |
| 41 | 2019 | Suicidal ideation among adolescents following natural disaster: The role of prior interpersonal violence | Zuromski, Kelly L et al.   | Survey | EF5 | 2011 Tornado outbreak in Alabama and Joplin | i) Mental health impacts of tornadoes | 2,000 adolescents | To examine an association between prior traumatic events, disaster exposure, and current mental health symptom, and suicidal ideation of residents after a tornado | 1. PTSD symptoms were associated with presence of suicidal ideation ( $b = .11$ , $p < .05$ ; OR = 1.12, 95% CI [1.03, 1.22]). Similar results were found for symptoms of MDD ( $b = .52$ , $p < .001$ ; OR = 1.68, 95% CI [1.42, 1.98]).<br>2. History of IPV exposure was more robustly related to suicidal ideation compared to PTSD and MDD symptoms, such that the odds of endorsing suicidal ideation were nearly two and half times larger for those with IPV history than for those without ( $b = .885$ , $p < .01$ ; OR = 2.42, 95% CI [1.37, 4.30]).<br>3. Prevalence of suicidal ideation since the tornadoes was significantly higher among those reporting history of IPV versus those who did not report IPV history (11.30% vs. 1.80%), $\chi^2 (1, N = 1977) = 81.93$ , $p < .001$ . |
| 42 | 2015 | Web Intervention for Adolescents Affected by Disaster: Population-Based Randomized Controlled Trial      | Ruggiero, Kenneth J et al. | Survey | EF5 | 2011 Tornado outbreak in Alabama and Joplin | iv) Mental health interventions       | 2,000 adolescents | To assess the efficacy of Bounce Back Now, a Web-based intervention for disaster-affected adolescents and their parents                                            | Intent-to-treat analyses revealed time * condition interactions for PTSD symptoms ( $B = -0.24$ , SE = 0.08, $p < .01$ ) and depressive symptoms ( $B = -0.23$ , SE = 0.09, $p < .01$ ). Post hoc comparisons revealed fewer PTSD and depressive symptoms for adolescents in the experimental versus control conditions at 12-month follow-up (PTSD: $B = -0.36$ , SE = 0.19, $p = .06$ ; depressive symptoms: $B = -0.42$ , SE = 0.19, $p = 0.03$ ). A time * condition interaction also was found that favored the BBN versus BBN p parent self-help condition for PTSD symptoms ( $B = 0.30$ , SE = 0.12, $p = .02$ ) but not depressive symptoms ( $B = 0.12$ , SE = 0.12, $p = .33$ ).                                                                                                           |
